# Supplementary material for: Sources of Dietary Salt in North and South India Estimated from 24 Hour Dietary Recall
Source: MDPI journal article supplement (doi:10.3390/nu11020318), 2019-02-01
Supplement: s1 [file s1]

## Supplementary file

**Table S1: Mean percent salt contribution by sex**

| Food group                                                   | Andhra Pradesh                |                               |         | Delhi and Haryana             |                               |         |
|--------------------------------------------------------------|-------------------------------|-------------------------------|---------|-------------------------------|-------------------------------|---------|
|                                                              | Male (n=380)                  | Female (n=377)                | p-value | Male (n=250)                  | Female (n=276)                | p-value |
| <b>Added salt</b>                                            | <b>87.21</b> (85.19 to 89.24) | <b>88.22</b> (87.14 to 89.31) | 0.780   | <b>82.90</b> (80.59 to 85.21) | <b>84.07</b> (81.89 to 86.25) | 0.943   |
| <b>Mean percent sodium contribution (without added salt)</b> |                               |                               |         |                               |                               |         |
| <b>Beverage (alcoholic)</b>                                  | <b>0.40</b> (0.16 to 0.65)    | <b>0.00</b> (0.00 to 0.00)    | 0.004   | <b>0.12</b> (0.05 to 0.19)    | <b>0.02</b> (0.00 to 0.05)    | 0.022   |
| <b>Beverage (non-alcoholic)</b>                              | <b>0.26</b> (0.04 to 0.47)    | <b>0.08</b> (0.00 to 0.18)    | 0.269   | <b>2.12</b> (0.21 to 4.03)    | <b>0.49</b> (0.15 to 0.83)    | 0.205   |
| <b>Bread and bakery products</b>                             | <b>0.99</b> (0.00 to 2.37)    | <b>1.95</b> (0.07 to 3.82)    | 0.842   | <b>14.87</b> (10.17 to 19.57) | <b>11.16</b> (7.07 to 15.26)  | 0.491   |
| <b>Cereal, grains and products</b>                           | <b>4.34</b> (2.99 to 5.68)    | <b>4.59</b> (3.94 to 5.23)    | 1.000   | <b>4.92</b> (3.40 to 6.45)    | <b>6.56</b> (2.90 to 10.21)   | 0.840   |
| <b>Dairy and dairy products</b>                              | <b>34.58</b> (28.39 to 40.76) | <b>38.77</b> (32.68 to 44.85) | 0.691   | <b>45.45</b> (38.54 to 52.36) | <b>50.93</b> (42.97 to 58.88) | 0.620   |
| <b>Fats and edible oils</b>                                  | <b>0.01</b> (0.00 to 0.03)    | <b>0.03</b> (0.00 to 0.08)    | 1.000   | <b>1.33</b> (0.40 to 2.26)    | <b>0.88</b> (0.00 to 2.07)    | 1.000   |
| <b>Fish and seafood</b>                                      | <b>7.62</b> (4.51 to 10.72)   | <b>6.82</b> (2.37 to 11.28)   | 1.000   | <b>0.16</b> (0.00 to 0.44)    | <b>0.01</b> (0.00 to 0.03)    | 0.607   |
| <b>Fruits and vegetables</b>                                 | <b>16.53</b> (12.59 to 20.47) | <b>17.08</b> (13.63 to 20.54) | 1.000   | <b>17.53</b> (14.51 to 20.54) | <b>19.59</b> (17.07 to 22.12) | 0.611   |
| <b>Meat, poultry and eggs</b>                                | <b>34.84</b> (25.92 to 43.75) | <b>30.20</b> (24.12 to 36.29) | 0.803   | <b>5.28</b> (1.59 to 8.96)    | <b>3.63</b> (1.38 to 5.88)    | 0.911   |
| <b>Snack foods</b>                                           | <b>0.18</b> (0.00 to 0.56)    | <b>0.10</b> (0.00 to 0.29)    | 1.000   | <b>8.09</b> (5.40 to 10.78)   | <b>6.72</b> (3.21 to 10.23)   | 1.000   |
| <b>Sugar, honey and related products</b>                     | <b>0.26</b> (0.19 to 0.33)    | <b>0.39</b> (0.27 to 0.50)    | 0.152   | <b>0.14</b> (0.00 to 0.30)    | <b>0.02</b> (0.00 to 0.05)    | 0.369   |

**Note:** The analysis is based on regression (compatible with svy command). Post-estimation *contrast* command was used to compare sex in each state and sex by state. The analysis is adjusted for multiple comparisons using Bonferroni's method.

Table S2: Mean percent salt contribution by age group

| Food group                                                   | Andhra Pradesh                |                               |                               |                         | Delhi and Haryana             |                               |                               |                         |
|--------------------------------------------------------------|-------------------------------|-------------------------------|-------------------------------|-------------------------|-------------------------------|-------------------------------|-------------------------------|-------------------------|
|                                                              | 20-39y (n=247)                | 40-59y (n=256)                | 60y up (n=254)                | p-value                 | 20-39y (n=193)                | 40-59y (n=180)                | 60y up (n=153)                | p-value                 |
| <b>Added salt</b>                                            | <b>88.04</b> (86.08 to 90.00) | <b>87.29</b> (85.50 to 89.09) | <b>87.20</b> (86.06 to 88.33) | 1.000<br>1.000<br>1.000 | <b>83.50</b> (81.17 to 85.83) | <b>82.68</b> (79.66 to 85.70) | <b>84.99</b> (83.05 to 86.93) | 1.000<br>1.000<br>1.000 |
| <b>Mean percent sodium contribution (without added salt)</b> |                               |                               |                               |                         |                               |                               |                               |                         |
| <b>Beverage (alcoholic)</b>                                  | <b>0.26</b> (0.00 to 0.54)    | <b>0.09</b> (0.00 to 0.23)    | <b>0.22</b> (0.00 to 0.49)    | 1.000<br>1.000<br>1.000 | <b>0.06</b> (0.01 to 0.10)    | <b>0.12</b> (0.00 to 0.23)    | <b>0.02</b> (0.00 to 0.06)    | 1.000<br>0.809<br>1.000 |
| <b>Beverage (non-alcoholic)</b>                              | <b>0.26</b> (0.03 to 0.49)    | <b>0.07</b> (0.00 to 0.15)    | <b>0.00</b> (0.00 to 0.00)    | 0.788<br>0.762<br>0.177 | <b>1.86</b> (0.13 to 3.59)    | <b>0.63</b> (0.00 to 1.39)    | <b>0.71</b> (0.12 to 1.31)    | 1.000<br>1.000<br>1.000 |
| <b>Bread and bakery products</b>                             | <b>0.93</b> (0.00 to 2.29)    | <b>2.60</b> (0.14 to 5.07)    | <b>1.30</b> (0.00 to 2.70)    | 1.000<br>1.000<br>1.000 | <b>12.69</b> (7.58 to 17.79)  | <b>13.33</b> (8.91 to 17.76)  | <b>14.45</b> (8.80 to 20.10)  | 1.000<br>1.000<br>1.000 |
| <b>Cereal, grains and products</b>                           | <b>4.74</b> (3.56 to 5.92)    | <b>4.04</b> (2.87 to 5.21)    | <b>4.14</b> (3.19 to 5.08)    | 1.000<br>1.000<br>1.000 | <b>5.65</b> (3.16 to 8.14)    | <b>6.86</b> (2.58 to 11.14)   | <b>3.27</b> (1.91 to 4.63)    | 1.000<br>0.720<br>0.615 |
| <b>Dairy and dairy products</b>                              | <b>35.15</b> (28.53 to 41.74) | <b>37.15</b> (32.10 to 42.21) | <b>41.74</b> (38.15 to 45.34) | 1.000<br>0.896<br>0.533 | <b>45.85</b> (38.10 to 53.60) | <b>48.52</b> (38.96 to 58.09) | <b>56.53</b> (48.75 to 64.32) | 1.000<br>1.000<br>0.353 |
| <b>Fats and edible oils</b>                                  | <b>0.03</b> (0.00 to 0.08)    | <b>0.00</b> (0.00 to 0.00)    | <b>0.00</b> (0.00 to 0.00)    | 1.000<br>1.000<br>1.000 | <b>1.21</b> (0.03 to 2.38)    | <b>1.12</b> (0.09 to 2.14)    | <b>0.72</b> (0.00 to 1.52)    | 1.000<br>1.000<br>1.000 |
| <b>Fish and seafood</b>                                      | <b>7.71</b> (3.71 to 11.72)   | <b>5.99</b> (2.09 to 9.90)    | <b>7.78</b> (6.07 to 9.48)    | 1.000<br>1.000<br>1.000 | <b>0.14</b> (0.00 to 0.40)    | <b>0.00</b> (0.00 to 0.00)    | <b>0.06</b> (0.00 to 0.16)    | 1.000<br>1.000<br>1.000 |
| <b>Fruits and vegetables</b>                                 | <b>17.98</b> (13.58 to 22.38) | <b>15.72</b> (13.82 to 17.62) | <b>14.12</b> (11.83 to 16.41) | 1.000<br>1.000<br>0.781 | <b>19.96</b> (16.63 to 23.28) | <b>16.49</b> (14.14 to 18.84) | <b>16.77</b> (14.15 to 19.40) | 0.585<br>1.000<br>0.860 |
| <b>Meat, poultry and eggs</b>                                | <b>32.50</b> (23.03 to 41.98) | <b>34.06</b> (26.82 to 41.29) | <b>29.70</b> (25.87 to 33.53) | 1.000<br>1.000<br>1.000 | <b>5.31</b> (1.51 to 9.11)    | <b>3.78</b> (2.06 to 5.50)    | <b>2.58</b> (0.90 to 4.26)    | 1.000<br>1.000<br>1.000 |
| <b>Snack foods</b>                                           | <b>0.08</b> (0.00 to 0.25)    | <b>0.00</b> (0.00 to 0.00)    | <b>0.67</b> (0.00 to 2.15)    | 1.000<br>1.000<br>1.000 | <b>7.23</b> (3.91 to 10.54)   | <b>9.00</b> (5.29 to 12.71)   | <b>4.83</b> (1.39 to 8.28)    | 1.000<br>0.654<br>1.000 |
| <b>Sugar, honey and related products</b>                     | <b>0.35</b> (0.22 to 0.49)    | <b>0.26</b> (0.20 to 0.33)    | <b>0.32</b> (0.20 to 0.45)    | 1.000<br>1.000<br>1.000 | <b>0.06</b> (0.00 to 0.15)    | <b>0.15</b> (0.00 to 0.37)    | <b>0.04</b> (0.00 to 0.08)    | 1.000<br>1.000<br>1.000 |

**NOTE:** first p-value reported is for the comparison between 20-39 and 40-59; second p-value is for the comparison between 40-59 and 60y up; third p-value is for the comparison between 20-39 and 60y up. The analysis is based on regression (compatible with svy command). Post-estimation *contrast* command was used to compare the age group in each state and age group by state. The analysis is adjusted for multiple comparisons using Bonferroni's method.

**Table S3: Mean percent salt contribution by area**

| Food group                                                   | Andhra Pradesh                |                               |                               |                           | Delhi and Haryana             |                               |                               |                           |
|--------------------------------------------------------------|-------------------------------|-------------------------------|-------------------------------|---------------------------|-------------------------------|-------------------------------|-------------------------------|---------------------------|
|                                                              | Slum (n=251)                  | Urban (n=280)                 | Rural (n=226)                 | p-value                   | Slum (n=152)                  | Urban (n=126)                 | Rural (n=248)                 | p-value                   |
| <b>Added salt</b>                                            | <b>88.97</b> (87.29 to 90.65) | <b>90.49</b> (88.25 to 92.72) | <b>86.44</b> (85.45 to 87.43) | 1.000<br>0.009<br>0.073   | <b>83.10</b> (80.88 to 85.32) | <b>80.60</b> (77.34 to 83.86) | <b>86.01</b> (84.63 to 87.40) | 1.000<br>0.019<br>0.183   |
| <b>Mean percent sodium contribution (without added salt)</b> |                               |                               |                               |                           |                               |                               |                               |                           |
| <b>Beverage (alcoholic)</b>                                  | <b>0.80</b> (0.26 to 1.35)    | <b>0.10</b> (0.00 to 0.21)    | <b>0.20</b> (0.00 to 0.46)    | 0.087<br>1.000<br>0.311   | <b>0.03</b> (0.00 to 0.08)    | <b>0.02</b> (0.00 to 0.05)    | <b>0.12</b> (0.04 to 0.21)    | 1.000<br>0.165<br>0.384   |
| <b>Beverage (non-alcoholic)</b>                              | <b>0.44</b> (0.00 to 0.94)    | <b>0.24</b> (0.00 to 0.55)    | <b>0.11</b> (0.00 to 0.27)    | 1.000<br>1.000<br>1.000   | <b>0.29</b> (0.09 to 0.49)    | <b>2.04</b> (0.00 to 4.36)    | <b>0.95</b> (0.20 to 1.70)    | 0.873<br>1.000<br>0.583   |
| <b>Bread and bakery products</b>                             | <b>0.00</b> (0.00 to 0.00)    | <b>3.57</b> (0.99 to 6.16)    | <b>0.70</b> (0.00 to 1.66)    | 0.046<br>0.261<br>0.915   | <b>17.85</b> (13.13 to 22.58) | <b>16.77</b> (11.05 to 22.49) | <b>8.97</b> (4.92 to 13.02)   | 1.000<br>0.185<br>0.035   |
| <b>Cereal, grains and products</b>                           | <b>4.59</b> (4.10 to 5.07)    | <b>6.52</b> (5.66 to 7.39)    | <b>3.59</b> (2.95 to 4.23)    | 0.001<br><0.001<br>0.097  | <b>7.37</b> (4.76 to 9.99)    | <b>7.93</b> (4.06 to 11.81)   | <b>3.41</b> (2.04 to 4.78)    | 1.000<br>0.197<br>0.057   |
| <b>Dairy and dairy products</b>                              | <b>30.06</b> (25.37 to 34.76) | <b>46.64</b> (41.67 to 51.61) | <b>33.03</b> (28.92 to 37.14) | <0.001<br><0.001<br>1.000 | <b>33.17</b> (28.92 to 37.41) | <b>32.01</b> (26.50 to 37.52) | <b>65.03</b> (60.60 to 69.45) | 1.000<br><0.001<br><0.001 |
| <b>Fats and edible oils</b>                                  | <b>0.22</b> (0.00 to 0.60)    | <b>0.02</b> (0.00 to 0.05)    | <b>0.00</b> (0.00 to 0.00)    | 1.000<br>0.891<br>1.000   | <b>1.44</b> (0.13 to 2.74)    | <b>2.09</b> (0.54 to 3.64)    | <b>0.20</b> (0.00 to 0.45)    | 1.000<br>0.118<br>0.421   |
| <b>Fish and seafood</b>                                      | <b>2.73</b> (0.00 to 5.56)    | <b>0.95</b> (0.00 to 2.12)    | <b>10.23</b> (8.18 to 12.29)  | 1.000<br><0.001<br><0.001 | <b>0.85</b> (0.00 to 2.34)    | <b>0.01</b> (0.00 to 0.03)    | <b>0.00</b> (0.00 to 0.00)    | 1.000<br>1.000<br>1.000   |
| <b>Fruits and vegetables</b>                                 | <b>19.00</b> (16.51 to 21.48) | <b>20.03</b> (16.01 to 24.04) | <b>15.27</b> (11.81 to 18.73) | 1.000<br>0.484<br>0.529   | <b>26.73</b> (23.65 to 29.81) | <b>21.60</b> (18.29 to 24.91) | <b>14.16</b> (11.72 to 16.59) | 0.167<br>0.003<br><0.001  |
| <b>Meat, poultry and eggs</b>                                | <b>41.85</b> (36.21 to 47.48) | <b>21.04</b> (17.00 to 25.09) | <b>36.56</b> (29.41 to 43.71) | <0.001<br>0.002<br>1.000  | <b>5.95</b> (3.52 to 8.38)    | <b>5.47</b> (1.75 to 9.19)    | <b>3.35</b> (0.48 to 6.23)    | 1.000<br>1.000<br>1.000   |
| <b>Snack foods</b>                                           | <b>0.01</b> (0.00 to 0.02)    | <b>0.50</b> (0.00 to 1.23)    | <b>0.00</b> (0.00 to 0.00)    | 1.000<br>1.000<br>1.000   | <b>6.30</b> (1.45 to 11.15)   | <b>11.91</b> (7.19 to 16.64)  | <b>3.77</b> (1.86 to 5.67)    | 0.639<br>0.013<br>1.000   |
| <b>Sugar, honey and related products</b>                     | <b>0.30</b> (0.18 to 0.42)    | <b>0.38</b> (0.29 to 0.47)    | <b>0.30</b> (0.18 to 0.43)    | 1.000<br>1.000<br>1.000   | <b>0.03</b> (0.00 to 0.06)    | <b>0.14</b> (0.00 to 0.34)    | <b>0.04</b> (0.01 to 0.07)    | 1.000<br>1.000<br>1.000   |

**NOTE:** first p-value reported is for the comparison between slum and urban; second p-value is for the comparison between urban and rural; third p-value is for the comparison between slum and rural. The analysis is based on regression (compatible with svy command). Post-estimation *contrast* command was used to compare the area classification in each state and area classification by state. The analysis is adjusted for multiple comparisons using Bonferroni's method.

Table S4: Mean percent salt contribution by education level

| Food group                                            | Andhra Pradesh           |                            |                          |                          | Delhi and Haryana        |                            |                          |                         |
|-------------------------------------------------------|--------------------------|----------------------------|--------------------------|--------------------------|--------------------------|----------------------------|--------------------------|-------------------------|
|                                                       | Primary level<br>(n=528) | Secondary level<br>(n=130) | Tertiary level<br>(n=99) | p-value                  | Primary level<br>(n=285) | Secondary level<br>(n=125) | Tertiary level<br>(n=99) | p-value                 |
| Added salt                                            | 87.17 (86.00 to 88.35)   | 88.30 (86.35 to 90.26)     | 89.01 (86.43 to 91.60)   | 1.000<br>1.000<br>0.848  | 85.04 (83.18 to 86.90)   | 83.45 (79.36 to 87.53)     | 80.36 (77.72 to 83.00)   | 1.000<br>1.000<br>0.033 |
| Mean percent sodium contribution (without added salt) |                          |                            |                          |                          |                          |                            |                          |                         |
| Beverage (alcoholic)                                  | 0.22 (0.02 to 0.43)      | 0.24 (0.00 to 0.53)        | 0.08 (0.01 to 0.15)      | 1.000<br>1.000<br>1.000  | 0.08 (0.00 to 0.16)      | 0.12 (0.05 to 0.18)        | 0.00 (0.00 to 0.01)      | 1.000<br>0.004<br>0.526 |
| Beverage (non-alcoholic)                              | 0.04 (0.00 to 0.09)      | 0.27 (0.00 to 0.64)        | 0.55 (0.00 to 1.18)      | 1.000<br>1.000<br>0.682  | 0.76 (0.19 to 1.32)      | 2.34 (0.00 to 5.59)        | 1.32 (0.00 to 2.96)      | 1.000<br>1.000<br>1.000 |
| Bread and bakery products                             | 1.04 (0.00 to 2.17)      | 1.94 (0.00 to .51)         | 2.47 (0.00 to 6.81)      | 1.000<br>1.000<br>1.000  | 9.90 (5.16 to 14.64)     | 14.03 (7.96 to 20.09)      | 17.36 (9.10 to 25.62)    | 1.000<br>1.000<br>0.784 |
| Cereal, grains and products                           | 4.20 (3.44 to 4.96)      | 5.41 (4.40 to 6.41)        | 3.92 (2.54 to 5.29)      | 0.029<br>0.003<br>1.000  | 4.43 (2.71 to 6.15)      | 6.16 (1.97 to 10.35)       | 6.82 (2.74 to 10.90)     | 1.000<br>1.000<br>1.000 |
| Dairy and dairy products                              | 36.62 (33.34 to 39.91)   | 36.29 (27.70 to 44.89)     | 37.27 (27.73 to 46.82)   | 1.000<br>1.000<br>1.000  | 56.12 (50.05 to 62.20)   | 45.70 (37.09 to 54.32)     | 37.01 (29.19 to 44.82)   | 0.136<br>0.733<br>0.001 |
| Fats and edible oils                                  | 0.02 (0.00 to 0.06)      | 0.01 (0.00 to 0.01)        | 0.03 (0.00 to 0.09)      | 1.000<br>1.000<br>1.000  | 0.38 (0.00 to 0.78)      | 1.32 (0.06 to 2.57)        | 2.33 (0.00 to 4.87)      | 0.977<br>1.000<br>0.841 |
| Fish and seafood                                      | 7.37 (4.37 to 10.36)     | 9.83 (6.51 to 13.15)       | 1.94 (0.48 to 3.40)      | 0.674<br><0.001<br>0.001 | 0.01 (0.00 to 0.03)      | 0.00 (0.00 to 0.00)        | 0.35 (0.00 to 0.98)      | 1.000<br>1.000<br>1.000 |
| Fruits and vegetables                                 | 15.83 (13.87 to 17.79)   | 18.15 (14.34 to 21.95)     | 18.71 (10.80 to 26.63)   | 0.957<br>1.000<br>1.000  | 19.04 (15.66 to 22.41)   | 18.18 (14.51 to 21.85)     | 16.96 (13.20 to 20.72)   | 1.000<br>1.000<br>1.000 |
| Meat, poultry and eggs                                | 34.24 (29.65 to 38.82)   | 27.37 (16.98 to 37.76)     | 34.44 (18.40 to 50.48)   | 1.000<br>0.388<br>1.000  | 3.13 (1.64 to 4.62)      | 5.17 (1.45 to 8.88)        | 6.28 (1.38 to 11.18)     | 1.000<br>1.000<br>1.000 |
| Snack foods                                           | 0.15 (0.00 to 0.46)      | 0.00 (0.00 to 0.00)        | 0.34 (0.00 to 0.99)      | 1.000<br>1.000<br>1.000  | 6.13 (3.88 to 8.39)      | 6.84 (2.95 to 10.73)       | 11.45 (5.29 to 17.71)    | 1.000<br>1.000<br>0.775 |
| Sugar, honey and related products                     | 0.27 (0.22 to 0.33)      | 0.49 (0.16 to 0.83)        | 0.25 (0.01 to 0.39)      | 1.000<br>0.807<br>1.000  | 0.02 (0.00 to 0.05)      | 0.15 (0.00 to 0.38)        | 0.12 (0.00 to 0.33)      | 1.000<br>1.000<br>1.000 |

**NOTE:** first p-value reported is for the comparison between primary and secondary level; second p-value is for the comparison between secondary and tertiary level; third p-value is for the comparison between primary and tertiary level. The analysis is based on regression (compatible with svy command). Post-estimation *contrast* command was used to compare the education level in each state. The analysis is adjusted for multiple comparisons using Bonferroni's method.

**Table S5: Mean percent salt contribution by income in urban Andhra Pradesh**

| Food group                                                   | Middle income A (n=67) | Middle income B (n=73) | Upper income A (n=66)  | Upper income B (n=74)  | p-value                                                     |
|--------------------------------------------------------------|------------------------|------------------------|------------------------|------------------------|-------------------------------------------------------------|
| <b>Added salt</b>                                            | 89.49 (87.58 to 91.39) | 92.21 (90.34 to 94.08) | 89.09 (86.75 to 91.43) | 88.74 (85.47 to 92.00) | All p's NS                                                  |
| <b>Mean percent sodium contribution (without added salt)</b> |                        |                        |                        |                        |                                                             |
| <b>Beverage (alcoholic)</b>                                  | 0.48 (0.00 to 0.95)    | 0.09 (0.00 to 0.28)    | 0.06 (0.01 to 0.10)    | 0.08 (0.00 to 0.18)    | All p's NS                                                  |
| <b>Beverage (non-alcoholic)</b>                              | 0.60 (0.00 to 1.27)    | 0.00 (0.00 to 0.00)    | 0.14 (0.00 to 0.31)    | 0.49 (0.00 to 1.00)    | All p's NS                                                  |
| <b>Bread and bakery products</b>                             | 0.33 (0.00 to 1.03)    | 2.96 (0.00 to 6.24)    | 2.17 (0.00 to 4.50)    | 4.67 (0.50 to 8.84)    | All p's NS                                                  |
| <b>Cereal, grains and products</b>                           | 4.34 (3.82 to 4.86)    | 7.63 (6.60 to 8.66)    | 3.69 (2.68 to 4.69)    | 5.68 (4.81 to 6.55)    | MB vs MA: p<0.001<br>UA vs MB: p<0.001<br>UA vs UB: p=0.036 |
| <b>Dairy and dairy products</b>                              | 34.74 (29.69 to 39.78) | 50.23 (45.96 to 54.51) | 39.49 (28.10 to 50.87) | 44.20 (34.76 to 53.64) | MB vs MA: p=0.001                                           |
| <b>Fats and edible oils</b>                                  | 0.01 (0.00 to 0.02)    | 0.04 (0.00 to 0.09)    | 0.01 (0.00 to 0.02)    | 0.01 (0.00 to 0.01)    | All p's NS                                                  |
| <b>Fish and seafood</b>                                      | 1.77 (0.00 to 3.84)    | 1.67 (0.00 to 3.64)    | 0.52 (0.04 to 1.00)    | 0.08 (0.00 to 0.24)    | All p's NS                                                  |
| <b>Fruits and vegetables</b>                                 | 15.51 (11.51 to 19.50) | 21.01 (13.28 to 28.73) | 16.66 (15.12 to 18.21) | 19.58 (16.35 to 22.82) | All p's NS                                                  |
| <b>Meat, poultry and eggs</b>                                | 42.01 (33.05 to 50.97) | 15.94 (11.00 to 20.88) | 36.72 (25.15 to 48.30) | 23.73 (19.99 to 27.48) | MB vs MA: p=0.002<br>UB vs MA: p=0.003<br>UA vs MB: p=0.030 |
| <b>Snack foods</b>                                           | 0.01 (0.00 to 0.01)    | 0.00 (0.00 to 0.00)    | 0.00 (0.00 to 0.00)    | 1.14 (0.00 to 2.83)    | All p's NS                                                  |
| <b>Sugar, honey and related products</b>                     | 0.22 (0.14 to 0.30)    | 0.43 (0.35 to 0.50)    | 0.54 (0.06 to 1.02)    | 0.33 (0.19 to 0.47)    | MB vs MA: p=0.023                                           |
